# Supplementary material for: One Week of CDAHFD Induces Steatohepatitis and Mitochondrial Dysfunction with Oxidative Stress in Liver
Source: MDPI journal article supplement (doi:10.3390/ijms22115851), 2021-05-29
Supplement: s1 [file s1]

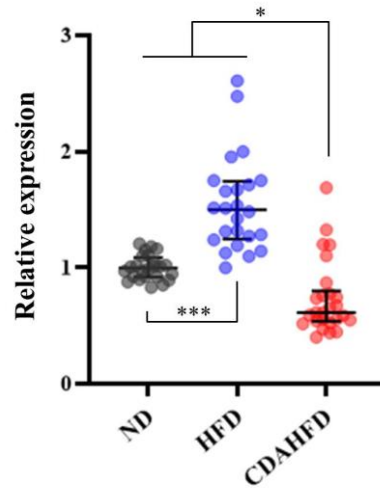

**Figure S1. Gene expression analysis for integrated *Sod1* and 2**

The integrated analysis of *Sod1* and 2 in each group showed significant decrease the relative expression values in CDAHFD group compared to other 2 group. On the other hand in the HFD group, the values were increased compared to other 2 group. \* $p < 0.05$  and \*\*\* $p < 0.001$ , respectively.
