# Supplementary material for: One Week of CDAHFD Induces Steatohepatitis and Mitochondrial Dysfunction with Oxidative Stress in Liver
Source: Int J Mol Sci. 2021 May 29;22(11):5851. doi: 10.3390/ijms22115851 (PMC8198552; doi:10.3390/ijms22115851)
Supplement: Supplementary file 1 [file ijms-22-05851-s001.zip › Supplementary table S2 antibody infomation.xlsx]

## Sheet: Sheet1
Table S2. Information of the antibody in the WB analysis.
All antibodies were diluted using 5% skim milk/TBST buffer.
No.	Antibody target	Supplier	Cat#	Host species	Dilution	Target sample type	Gel %	Remarks
1	OXPHOS proteins	Abcam	ab110413	Mouse	x5000	Isolated mitochondria	15	No boil upon sample preparation
2	COX4	Abclonal	A6564	Rabbit	x2000	Isolated mitochondria	15
3	mtCOX2	Abclonal	A11522	Rabbit	x5000	Isolated mitochondria	15
4	TOMM20	Proteintech	11802-1-AP	Rabbit	x1000	Isolated mitochondria	15
5	TFAM	Proteintech	225816-1-AP	Rabbit	x2000	Isolated mitochondria	15
6	POLG	Abclonal	A8451	Rabbit	x2000	Isolated mitochondria	10
7	TFB2M	Abclonal	A14921	Rabbit	x2000	Isolated mitochondria	15
8	NRF2	Proteintech	16396-1-AP	Rabbit	x1000	Whole liver lysate	10
9	KEAP1	Proteintech	10503-2-AP	Rabbit	x1000	Whole liver lysate	10
10	HO1	Proteintech	10701-1-AP	Rabbit	x1000	Whole liver lysate	10
11	NQO1	Proteintech	67240-1-IG	Mouse	x1000	Whole liver lysate	10
12	GAPHD	Proteintech	60004-1-ｌg	Mouse	x5000	Whole liver lysate	10
13	Mouse IgG	CST	7076	Horse	x3000			HRP-linked secondary antibody
14	Rabbit IgG	CST	7074	Goat	x3000			HRP-linked secondary antibody
